# Supplementary material for: Association of triglyceride glucose index and triglyceride glucose-body mass index with sudden cardiac arrest in the general population
Source: PubMed Central journal article supplement (PMC11102616; doi:10.1186/s12933-024-02275-2), 2024-05-18

## Supplement

**Table S1.** Diagnostic codes for diseases.

**Table S2.** Baseline characteristics of overall participants.

**Table S3.** Proportion of Missing Rates for Baseline Characteristics.

**Table S4.** Adjusted median time difference for SCA occurrence in the second, third, fourth, and highest quintile groups compared to the TyG index and TyG-BMI lowest quintile (Q1) groups.

**Table S5.** Adjusted median time difference for SCA occurrence in the second, third, fourth, and highest quintile groups compared to the TyG index and TyG-BMI lowest quintile (Q1) groups according to sex.

**Table S6.** Multivariate COX regression analyses of TyG index and TyG-BMI with risk of SCA.

**Table S7.** Multivariate Cox regression of per SD increase in TyG index and TyG-BMI and SCA risk after multiple imputations of five data sets.

**Table S8.** Multivariate Cox regression models stratified by sex to investigate the association of TyG and TyG-BMI levels with the incidence of SCA.

**Table S9.** Multivariate Cox regression model to study the relationship between TyG levels and SCA incidence.

**Figure S1.** Directed acyclic graph of the link between TyG index and TyG-BMI and the onset of SCA.

**Figure S2.** Restricted cubic splines of TyG index, TyG-BMI and risk of SCA in women and men.

**Table S1. Diagnostic codes for diseases**

| Diseases            | ICD-9 diagnosis                                                                                                   | ICD-10 diagnosis  | Self-report <sup>a</sup> | Primary Care <sup>b</sup> | Medication <sup>c</sup> / Operation code, self-reported <sup>d</sup>                                  |
|---------------------|-------------------------------------------------------------------------------------------------------------------|-------------------|--------------------------|---------------------------|-------------------------------------------------------------------------------------------------------|
| Hypertension        | 401, 4010, 4011, 4019, 402, 4020, 4021, 4029, 403, 4030, 4031, 4039, 404, 4040, 4041, 4049, 405, 4050, 4051, 4059 | I10-I13, I15      | 20002                    | Category 3000             | Blood pressure medication / NA                                                                        |
| Diabetes            | 2500, 25000, 25001, 25009, 2501, 25011, 25019, 2503, 2504, 2505, 25099                                            | E10-E14           | 20002                    | Category 3000             | Insulin/ NA                                                                                           |
| CAD                 | 410, 4109, 411, 4119, 412, 4129, 413, 4139, 4140, 4148, 4149                                                      | I20-I25           | 20002                    | Category 3000             | NA / Coronary angioplasty (PTCA) +/- stent; Coronary artery bypass grafts (CABG); Triple heart bypass |
| Heart failure       | 428, 4280, 4281, 4289                                                                                             | I50               | 20002                    | Category 3000             | NA                                                                                                    |
| cardiomyopathy      | 422, 4229, 425, 4251, 4254                                                                                        | I40-I43           | 20002                    | Category 3000             | NA                                                                                                    |
| Heart valve disease | 394, 3940, 3942, 3949, 395, 3951, 3959, 396, 3969, 424, 4240, 4241, 4243, 4249                                    | I05-I09, I34-I38  | 20002                    | Category 3000             | NA / Aortic valve repair/replacement; Mitral valve repair/replacement; Other valve repair/replacement |
| Arrhythmia          | 426, 4260, 4261, 4263, 4264, 4265, 4266, 4267, 4269, 427, 4270, 4271, 4273, 4274, 4276, 4278, 4279                | I44, I45, I47-I49 | 20002                    | Category 3000             | NA / Pacemaker; Defibrillator insertion; Cardiac ablation                                             |

ICD: International Classification of Disease. NA, not applicable.

<sup>a</sup> 20002 is the data code used in UK Biobank: Non-cancer illness code, self-reported.

<sup>b</sup> This category contains data on primary care data recorded by health professionals working at general practices.

<sup>c</sup> Data-field 6153 and 6177.

<sup>d</sup> Data-Field 20004

**Table S2. Baseline characteristics of overall participants (N=355,242).**

---

|                                  |                |                   |
|----------------------------------|----------------|-------------------|
| Age (years)                      |                | 55.80 ± 8.09      |
| TDI                              |                | -1.33 ± 3.07      |
| BMI (Kg/m <sup>2</sup> )         |                | 27.32 ± 4.72      |
| Waist (cm)                       |                | 89.89 ± 13.27     |
| DBP (mmHg)                       |                | 82.53 ± 10.09     |
| SBP (mmHg)                       |                | 137.72 ± 18.51    |
| Physical activity (MET-min/week) |                | 2662.51 ± 2347.96 |
| TC (mmol/L)                      |                | 5.75 ± 1.11       |
| HDL (mmol/L)                     |                | 1.46 ± 0.38       |
| LDL (mmol/L)                     |                | 3.61 ± 0.85       |
| Fasting time (hours)             |                | 3.80 ± 2.45       |
| Diet score                       |                | 5.07 ± 1.52       |
| Sex                              |                |                   |
|                                  | Women          | 193,060 (54.35%)  |
|                                  | Men            | 162,182 (45.65%)  |
| Race                             |                |                   |
|                                  | Non- Caucasian | 21,698 (6.11%)    |
|                                  | Caucasian      | 333,544 (93.89%)  |
| Hypertension                     |                |                   |
|                                  | No             | 267,233 (75.23%)  |
|                                  | Yes            | 88,009 (24.77%)   |
| DM                               |                |                   |
|                                  | No             | 339,957 (95.7%)   |
|                                  | Yes            | 15,285 (4.3%)     |
| Smoker                           |                |                   |
|                                  | Non-active     | 317,877 (89.58%)  |
|                                  | Active         | 36,977 (10.42%)   |
| Drinker                          |                |                   |
|                                  | Non-active     | 27,604 (7.78%)    |
|                                  | Active         | 327,248 (92.22%)  |
| Antihypertensives                |                |                   |
|                                  | No             | 293,500 (82.71%)  |
|                                  | Yes            | 61,334 (17.29%)   |
| Lowering lipids                  |                |                   |
|                                  | No             | 308,012 (86.8%)   |
|                                  | Yes            | 46,822 (13.2%)    |
| Insulin                          |                |                   |
|                                  | No             | 351,750 (99.13%)  |
|                                  | Yes            | 3,084 (0.87%)     |

---

**Table S3. Proportion of Missing Rates for Baseline Characteristics.**

| <b>Variables</b>  | <b>Complete (Yes/No)</b> | <b>Missing rates (Number / %)</b> |
|-------------------|--------------------------|-----------------------------------|
| Age               | No                       |                                   |
| Sex               | No                       |                                   |
| Race              | No                       |                                   |
| TDI               | Yes                      | 441/ 0.12%                        |
| BMI               | Yes                      |                                   |
| Waist             | Yes                      | 724 / 0.2%                        |
| DBP               | Yes                      | 375 / 0.105%                      |
| SBP               | Yes                      | 376 / 0.106 %                     |
| Physical activity | Yes                      | 79,315 / 22.32%                   |
| Menopause status  | No                       |                                   |
| TC                | Yes                      | 86 / 0.024%                       |
| HDL               | Yes                      | 82 / 0.023%                       |
| LDL               | Yes                      | 532 / 0.15%                       |
| Fasting time      | No                       |                                   |
| Diet score        | Yes                      | 13,136 / 3.7%                     |
| Sex               | No                       |                                   |
| Race              | No                       |                                   |
| Hypertension      | No                       |                                   |
| DM                | No                       |                                   |
| Smoker            | No                       |                                   |
| Drinker           | No                       |                                   |
| Antihypertensives | No                       |                                   |
| Lowering lipids   | No                       |                                   |
| Insulin           | No                       |                                   |

**Table S4.** Adjusted median time difference for SCA occurrence in the second, third, fourth, and highest quintile groups compared to the TyG index and TyG-BMI lowest quintile (Q1) groups.

| Categories             | Median Difference (months) | 95 % Lower CI | 95 % Upper CI |
|------------------------|----------------------------|---------------|---------------|
| <b>TyG<sup>a</sup></b> |                            |               |               |
| Q2                     | 14.32                      | 34.19         | -4.43         |
| Q3                     | 11.34                      | 30.89         | -7.12         |
| Q4                     | 16.65                      | 36.23         | -1.86         |
| Q5                     | 25.8                       | 45.69         | 6.98          |
| <b>TyG-BMI</b>         |                            |               |               |
| Q2                     | -4.48                      | 10.89         | -19           |
| Q3                     | 3.07                       | 18.21         | -11.26        |
| Q4                     | -2.48                      | 12.38         | -16.56        |
| Q5                     | 19.19                      | 34.79         | 4.39          |

Multivariate AFT model adjusted age, sex, race, TDI, physical activity, fasting time, diet score, drinking status, lowering lipids drugs, antihypertensives, insulin, and diabetes.

<sup>a</sup> Additional adjustment of body mass index in the model.

**Table S5.** Adjusted median time difference for SCA occurrence in the second, third, fourth, and highest quintile groups compared to the TyG index and TyG-BMI lowest quintile (Q1) groups according to sex.

| Categories               | Median Difference (months) | 95 % Lower CI | 95 % Upper CI | P for trend  |
|--------------------------|----------------------------|---------------|---------------|--------------|
| <b>Men</b>               |                            |               |               |              |
| <b>TyG<sup>a</sup></b>   |                            |               |               | <b>0.304</b> |
| Q2                       | 5.65                       | 23.73         | -11.16        |              |
| Q3                       | 4.03                       | 21.57         | -12.3         |              |
| Q4                       | 3.58                       | 20.81         | -12.47        |              |
| Q5                       | 9.83                       | 27.07         | -6.26         |              |
| <b>TyG-BMI</b>           |                            |               |               | <b>0.08</b>  |
| Q2                       | -2.78                      | 11.98         | -16.48        |              |
| Q3                       | 1.69                       | 15.97         | -11.63        |              |
| Q4                       | -2.57                      | 11.38         | -15.57        |              |
| Q5                       | 10.82                      | 25.67         | -3.04         |              |
| <b>Women<sup>b</sup></b> |                            |               |               |              |
| <b>TyG<sup>a</sup></b>   |                            |               |               | <b>0.006</b> |
| Q2                       | 24.81                      | 61.43         | -8.54         |              |
| Q3                       | 18.41                      | 55.23         | -15.06        |              |
| Q4                       | 36.77                      | 75.09         | 1.91          |              |
| Q5                       | 51.02                      | 91.65         | 14.14         |              |
| <b>TyG-BMI</b>           |                            |               |               | <b>0.05</b>  |
| Q2                       | -11.45                     | 16.39         | -36.89        |              |
| Q3                       | -1.95                      | 26.46         | -27.94        |              |
| Q4                       | -6.79                      | 21.61         | -32.74        |              |
| Q5                       | 23.44                      | 51.99         | -2.84         |              |

Multivariate AFT model adjusted age, sex, race, TDI, physical activity, fasting time, diet score, drinking status, lowering lipids drugs, antihypertensives, insulin, and diabetes.

<sup>a</sup> Indicates additional adjustments for body mass index.

<sup>b</sup> Indicates additional adjustments for menopausal status.

**Table S6. Multivariate COX regression analyses of TyG index and TyG-BMI with risk of SCA.**

| TyG <sup>b</sup> | Including coronary artery disease <sup>a</sup> |         | Excluding participants within two years of follow-up |         |
|------------------|------------------------------------------------|---------|------------------------------------------------------|---------|
|                  | HR (95% CI)                                    | P-value | HR (95% CI)                                          | P-value |
| Q1               | Reference                                      |         | Reference                                            |         |
| Q2               | 1.14 (0.97-1.35)                               | 0.107   | 1.15 (0.96-1.38)                                     | 0.137   |
| Q3               | 1.10 (0.94-1.30)                               | 0.234   | 1.12 (0.93-1.34)                                     | 0.234   |
| Q4               | 1.16 (0.99-1.36)                               | 0.068   | 1.18 (0.98-1.41)                                     | 0.079   |
| Q5               | 1.22 (1.04-1.43)                               | 0.014   | 1.28 (1.07-1.53)                                     | 0.007   |
| P for trend      | 0.025                                          |         | 0.01                                                 |         |
| Per SD increase  | 1.07 (1.02-1.12)                               | 0.004   | 1.09 (1.04-1.15)                                     | 0.001   |
| <b>TyG-BMI</b>   |                                                |         |                                                      |         |
| Q1               | Reference                                      |         | Reference                                            |         |
| Q2               | 0.96 (0.82-1.14)                               | 0.660   | 0.95 (0.79-1.14)                                     | 0.563   |
| Q3               | 1.01 (0.86-1.18)                               | 0.932   | 1.04 (0.87-1.24)                                     | 0.676   |
| Q4               | 0.97 (0.83-1.14)                               | 0.725   | 0.97 (0.82-1.16)                                     | 0.743   |
| Q5               | 1.19 (1.02-1.39)                               | 0.028   | 1.25 (1.06-1.48)                                     | 0.01    |
| P for trend      | 0.014                                          |         | 0.004                                                |         |
| Per SD increase  | 1.11 (1.06-1.16)                               | <0.001  | 1.14 (1.09-1.20)                                     | <0.001  |

Multivariate COX regression analyses adjusted for age, sex, race, TDI, physical activity, fasting time, diet score, drinking status, lowering lipids drugs, antihypertensives, insulin, and diabetes.

<sup>a</sup> Indicates additional adjustments for coronary artery disease.

<sup>b</sup> Indicates additional adjustments for body mass index.

**Table S7. Multivariate Cox regression of TyG index and TyG-BMI and SCA risk after multiple imputations of five data sets.**

|                  | Data set 1       | Data set 2       | Data set 3       | Data set 4       | Data set 5       | Pooled results   | P value |
|------------------|------------------|------------------|------------------|------------------|------------------|------------------|---------|
| TyG <sup>a</sup> | HR (95% CI)      | HR (95% CI)      | HR (95% CI)      | HR (95% CI)      | HR (95% CI)      | HR (95% CI)      | P-value |
| Q1               | Ref.             | Ref.             | Ref.             | Ref.             | Ref.             | Ref.             |         |
| Q2               | 1.16 (0.96-1.4)  | 1.16 (0.97-1.4)  | 1.16 (0.97-1.4)  | 1.16 (0.97-1.4)  | 1.16 (0.96-1.39) | 1.16 (0.97-1.39) | 0.114   |
| Q3               | 1.12 (0.94-1.35) | 1.12 (0.93-1.34) | 1.12 (0.93-1.34) | 1.13 (0.94-1.35) | 1.12 (0.93-1.34) | 1.12 (0.94-1.35) | 0.214   |
| Q4               | 1.18 (0.98-1.41) | 1.17 (0.98-1.4)  | 1.17 (0.98-1.4)  | 1.18 (0.99-1.41) | 1.17 (0.98-1.40) | 1.17 (0.98-1.40) | 0.80    |
| Q5               | 1.31 (1.1-1.56)  | 1.30 (1.09-1.55) | 1.30 (1.09-1.56) | 1.32 (1.11-1.58) | 1.30 (1.09-1.55) | 1.30 (1.09-1.56) | 0.003   |
| P for trend      | 0.006            | 0.007            | 0.006            | 0.004            | 0.008            |                  |         |
| Per SD increase  | 1.10 (1.04-1.15) | 1.09 (1.04-1.15) | 1.10 (1.04-1.15) | 1.10 (1.05-1.16) | 1.09 (1.04-1.15) | 1.09 (1.04-1.15) | <0.001  |
| TyG-BMI          |                  |                  |                  |                  |                  |                  |         |
| Q1               | Ref.             | Ref.             | Ref.             | Ref.             | Ref.             | Ref.             |         |
| Q2               | 0.95 (0.79-1.14) | 0.95 (0.79-1.14) | 0.95 (0.79-1.13) | 0.95 (0.79-1.13) | 0.95 (0.79-1.14) | 0.95 (0.79-1.14) | 0.579   |
| Q3               | 1.06 (0.89-1.26) | 1.06 (0.89-1.26) | 1.05 (0.88-1.25) | 1.05 (0.89-1.25) | 1.08 (0.91-1.28) | 1.06 (0.89-1.26) | 0.513   |
| Q4               | 0.97 (0.82-1.16) | 0.98 (0.83-1.17) | 0.97 (0.81-1.15) | 0.98 (0.83-1.17) | 1.0 (0.84-1.19)  | 0.98 (0.82-1.17) | 0.843   |
| Q5               | 1.26 (1.07-1.5)  | 1.27 (1.08-1.51) | 1.26 (1.07-1.5)  | 1.30 (1.1-1.53)  | 1.29 (1.09-1.52) | 1.28 (1.08-1.52) | 0.004   |
| P for trend      | 0.003            | 0.002            | 0.003            | <0.001           | 0.001            | <0.001           |         |
| Per SD increase  | 1.14 (1.08-1.19) | 1.14 (1.09-1.2)  | 1.14 (1.08-1.2)  | 1.15 (1.10-1.21) | 1.14 (1.09-1.2)  | 1.14 (1.09-1.2)  | <0.001  |

Multivariate COX regression analyses adjusted for age, sex, race, TDI, physical activity, fasting time, diet score, diabetes, drinking status, lowering lipids drugs, insulin, and antihypertensive medication.

<sup>a</sup> Indicates additional adjustments for body mass index.



**Table S8. Multivariate Cox regression models stratified by sex to investigate the association of TyG and TyG-BMI levels with the incidence of SCA**

|                  | Men              |         | Women <sup>a</sup> |         |
|------------------|------------------|---------|--------------------|---------|
| TyG <sup>b</sup> | HR (95% CI)      | P-value | HR (95% CI)        | P-value |
| Q1               |                  |         |                    |         |
| Q2               | 1.08 (0.85-1.37) | 0.52    | 1.25 (0.93-1.68)   | 0.146   |
| Q3               | 1.06 (0.84-1.33) | 0.642   | 1.18 (0.87-1.61)   | 0.282   |
| Q4               | 1.05 (0.84-1.32) | 0.675   | 1.39 (1.02-1.87)   | 0.035   |
| Q5               | 1.14 (0.92-1.43) | 0.236   | 1.56 (1.15-2.12)   | 0.005   |
| P for trend      | 0.304            |         | 0.005              |         |
| Per SD increase  | 1.05 (0.99-1.12) | 0.096   | 1.17 (1.07-1.28)   | <0.001  |
| <b>TyG-BMI</b>   |                  |         |                    |         |
| Q1               |                  |         |                    |         |
| Q2               | 0.95 (0.75-1.21) | 0.705   | 0.89 (0.67-1.18)   | 0.419   |
| Q3               | 1.03 (0.82-1.29) | 0.806   | 0.98 (0.74-1.31)   | 0.912   |
| Q4               | 0.96 (0.77-1.20) | 0.716   | 0.94 (0.70-1.25)   | 0.662   |
| Q5               | 1.19 (0.95-1.49) | 0.128   | 1.28 (0.98-1.66)   | 0.069   |
| P for trend      | 0.078            |         | 0.048              |         |
| Per SD increase  | 1.12 (1.05-1.19) | <0.001  | 1.15 (1.06-1.24)   | <0.001  |

Multivariate Cox regression analyses adjusted for age, sex, race, TDI, physical activity, fasting time, diet score, diabetes, drinking status, lowering lipids drugs, insulin, and antihypertensives.

<sup>a</sup> Indicates additional adjustments for menopausal status.

<sup>b</sup> Indicates additional adjustments for body mass index.

**Table S9. Multivariate Cox regression model to study the relationship between TyG levels and SCA incidence.**

| TyG             | HR (95% CI)      | P-value |
|-----------------|------------------|---------|
| Q1              | Reference        |         |
| Q2              | 1.13 (0.94-1.36) | 0.187   |
| Q3              | 1.09 (0.90-1.31) | 0.374   |
| Q4              | 1.13 (0.94-1.36) | 0.181   |
| Q5              | 1.22 (1.02-1.46) | 0.03    |
| P for trend     | 0.048            |         |
| Per SD increase | 1.07 (1.02-1.13) | 0.007   |

Multivariate COX regression analyses adjusted for age, sex, race, TDI, waist circumference, physical activity, fasting time, diet score, drinking status, lowering lipids drugs, antihypertensives, insulin, and diabetes.

**Figure S1.** Directed acyclic graph of the link between TyG index and TyG-BMI and the onset of SCA.

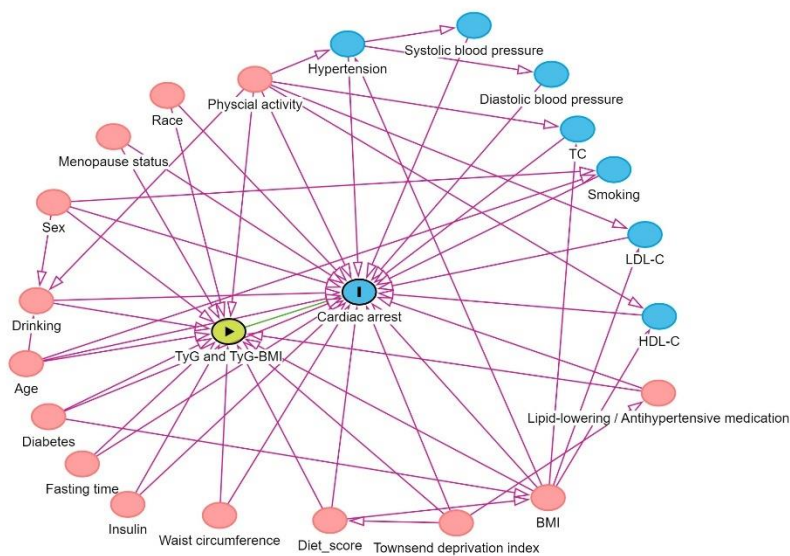

Diagram created with the help of DAGitty.net ([www.dagitty.net](http://www.dagitty.net)). Minimal adjustment set: sex, age, race, BMI, waist circumference, TDI, fasting time, physical activity, diet score, diabetes, lowering lipids, antihypertensives, insulin, and drinking status.

Pink represents exposure factors of interest and blue represents outcomes of interest and potential mediators of exposure factor-outcome associations that should not be adjusted for in the main analyses.

**Figure S2. Restricted cubic splines of TyG index, TyG-BMI and risk of SCA in women and men.**

The results have been adjusted for age, sex, race, TDI, physical activity, fasting time, diet score, drinking status, lowering lipids drugs, antihypertensives, insulin, and diabetes. Additional adjustment for BMI in the relationship between TyG and SCA.

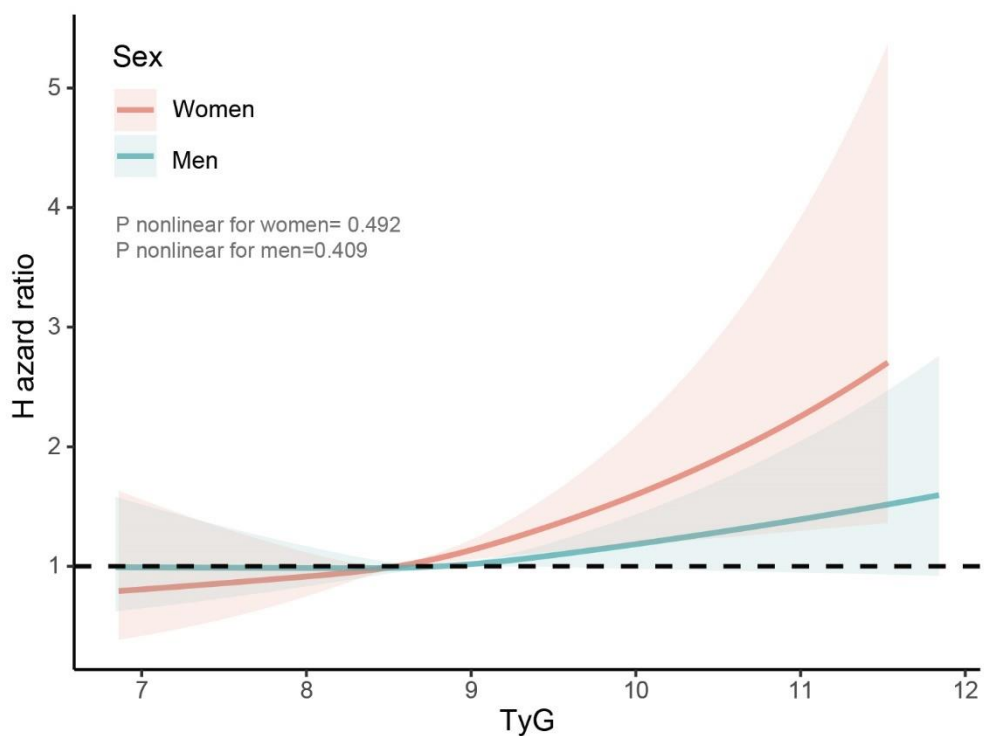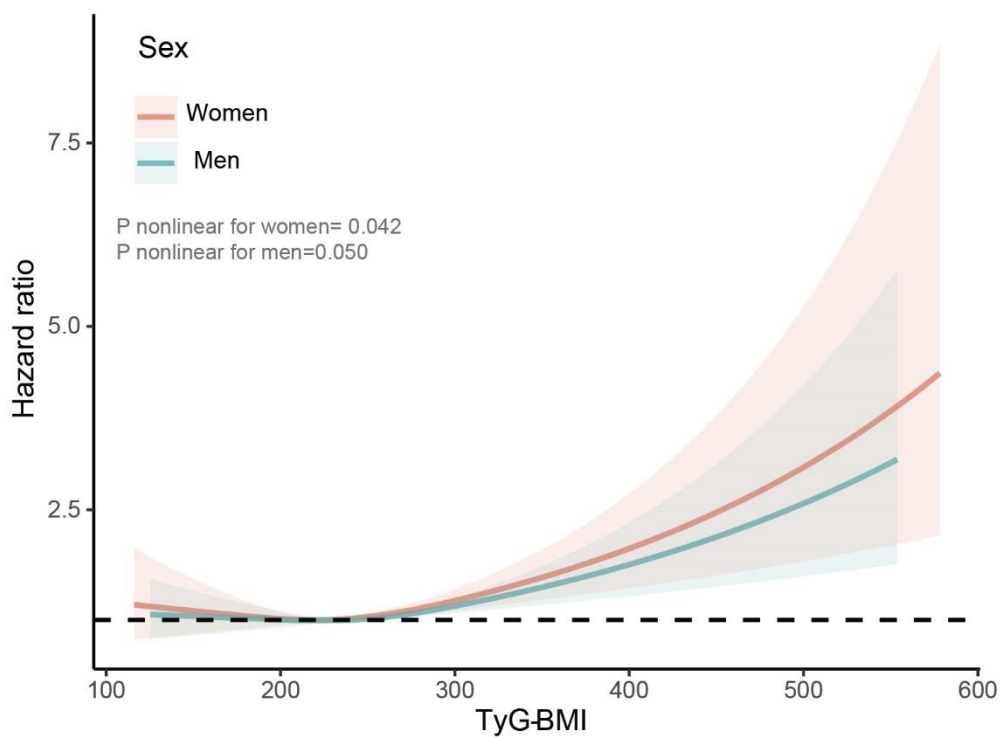

Supplement: 12933_2024_2275_MOESM1_ESM.pdf [file 12933_2024_2275_MOESM1_ESM.pdf]
